# Supplementary material for: Copper nanoparticle heterogeneous catalytic ‘click’ cycloaddition confirmed by single-molecule spectroscopy
Source: Springer Nature journal article supplement (doi:10.1038/ncomms5612), 2014-08-11
Supplement: 41467_2014_BFncomms5612_MOESM3_ESM.mol [file 41467_2014_BFncomms5612_MOESM3_ESM.mol]

  ChemDraw07241406042D

 40 43  0  0  0  0  0  0  0  0999 V2000
   -4.7213    1.1872    0.0000 C   0  0  0  0  0  0  0  0  0  0  0  0
   -4.7213    0.3589    0.0000 C   0  0  0  0  0  0  0  0  0  0  0  0
   -4.0046   -0.0555    0.0000 C   0  0  0  0  0  0  0  0  0  0  0  0
   -3.2873    0.3589    0.0000 C   0  0  0  0  0  0  0  0  0  0  0  0
   -3.2867    1.1872    0.0000 C   0  0  0  0  0  0  0  0  0  0  0  0
   -4.0046    1.6010    0.0000 C   0  0  0  0  0  0  0  0  0  0  0  0
   -4.0046   -0.8802    0.0000 C   0  0  0  0  0  0  0  0  0  0  0  0
   -4.7219   -1.2946    0.0000 C   0  0  0  0  0  0  0  0  0  0  0  0
   -4.7219   -2.1223    0.0000 N   0  0  0  0  0  0  0  0  0  0  0  0
   -4.0046   -2.5361    0.0000 B   0  5  0  0  0  0  0  0  0  0  0  0
   -3.2873   -2.1223    0.0000 N   0  3  0  0  0  0  0  0  0  0  0  0
   -3.2873   -1.2946    0.0000 C   0  0  0  0  0  0  0  0  0  0  0  0
   -2.5005   -2.3780    0.0000 C   0  0  0  0  0  0  0  0  0  0  0  0
   -2.0136   -1.7085    0.0000 C   0  0  0  0  0  0  0  0  0  0  0  0
   -2.5005   -1.0383    0.0000 C   0  0  0  0  0  0  0  0  0  0  0  0
   -5.5093   -1.0383    0.0000 C   0  0  0  0  0  0  0  0  0  0  0  0
   -5.9955   -1.7085    0.0000 C   0  0  0  0  0  0  0  0  0  0  0  0
   -5.5093   -2.3775    0.0000 C   0  0  0  0  0  0  0  0  0  0  0  0
   -2.2453   -0.2543    0.0000 C   0  0  0  0  0  0  0  0  0  0  0  0
   -2.2458   -3.1626    0.0000 C   0  0  0  0  0  0  0  0  0  0  0  0
   -3.5925   -3.2500    0.0000 F   0  0  0  0  0  0  0  0  0  0  0  0
   -4.4173   -3.2500    0.0000 F   0  0  0  0  0  0  0  0  0  0  0  0
   -4.0046    2.4258    0.0000 C   0  0  0  0  0  0  0  0  0  0  0  0
   -3.2902    2.8379    0.0000 O   0  0  0  0  0  0  0  0  0  0  0  0
   -4.7184    2.8379    0.0000 O   0  0  0  0  0  0  0  0  0  0  0  0
   -5.7639   -0.2538    0.0000 C   0  0  0  0  0  0  0  0  0  0  0  0
   -5.7645   -3.1620    0.0000 C   0  0  0  0  0  0  0  0  0  0  0  0
   -2.5758    2.4252    0.0000 C   0  0  0  0  0  0  0  0  0  0  0  0
    3.8527    2.8376    0.0000 C   0  0  0  0  0  0  0  0  0  0  0  0
    4.5670    2.4252    0.0000 N   0  0  0  0  0  0  0  0  0  0  0  0
    5.2813    2.8376    0.0000 N   0  3  0  0  0  0  0  0  0  0  0  0
    5.9955    3.2500    0.0000 N   0  5  0  0  0  0  0  0  0  0  0  0
   -1.8615    2.8376    0.0000 C   0  0  0  0  0  0  0  0  0  0  0  0
   -1.1472    2.4252    0.0000 C   0  0  0  0  0  0  0  0  0  0  0  0
   -0.4329    2.8376    0.0000 C   0  0  0  0  0  0  0  0  0  0  0  0
    0.2813    2.4252    0.0000 C   0  0  0  0  0  0  0  0  0  0  0  0
    0.9956    2.8376    0.0000 C   0  0  0  0  0  0  0  0  0  0  0  0
    1.7099    2.4252    0.0000 C   0  0  0  0  0  0  0  0  0  0  0  0
    2.4242    2.8376    0.0000 C   0  0  0  0  0  0  0  0  0  0  0  0
    3.1384    2.4252    0.0000 C   0  0  0  0  0  0  0  0  0  0  0  0
  1  2  2  0      
  2  3  1  0      
  3  4  2  0      
  4  5  1  0      
  5  6  2  0      
  6  1  1  0      
  3  7  1  0      
  7  8  1  0      
  8  9  1  0      
  9 10  1  0      
 10 11  1  0      
 11 12  1  0      
 12  7  2  0      
 11 13  2  0      
 13 14  1  0      
 14 15  2  0      
 15 12  1  0      
  8 16  2  0      
 16 17  1  0      
 17 18  2  0      
 18  9  1  0      
 15 19  1  0      
 13 20  1  0      
 10 21  1  0      
 10 22  1  0      
  6 23  1  0      
 23 24  1  0      
 23 25  2  0      
 16 26  1  0      
 18 27  1  0      
 24 28  1  0      
 28 33  1  0      
 40 29  1  0      
 29 30  1  0      
 30 31  2  0      
 31 32  2  0      
 33 34  1  0      
 34 35  1  0      
 35 36  1  0      
 36 37  1  0      
 37 38  1  0      
 38 39  1  0      
 39 40  1  0      
M  CHG  4  10  -1  11   1  31   1  32  -1
M  END
