# Supplementary material for: Copper nanoparticle heterogeneous catalytic ‘click’ cycloaddition confirmed by single-molecule spectroscopy
Source: Springer Nature journal article supplement (doi:10.1038/ncomms5612), 2014-08-11
Supplement: 41467_2014_BFncomms5612_MOESM5_ESM.mol [file 41467_2014_BFncomms5612_MOESM5_ESM.mol]

  ChemDraw07241406042D

 48 53  0  0  0  0  0  0  0  0999 V2000
   -5.8817    1.2707    0.0000 C   0  0  0  0  0  0  0  0  0  0  0  0
   -5.8817    0.4453    0.0000 C   0  0  0  0  0  0  0  0  0  0  0  0
   -5.1676    0.0327    0.0000 C   0  0  0  0  0  0  0  0  0  0  0  0
   -4.4529    0.4453    0.0000 C   0  0  0  0  0  0  0  0  0  0  0  0
   -4.4529    1.2707    0.0000 C   0  0  0  0  0  0  0  0  0  0  0  0
   -5.1676    1.6827    0.0000 C   0  0  0  0  0  0  0  0  0  0  0  0
   -5.1676   -0.7927    0.0000 C   0  0  0  0  0  0  0  0  0  0  0  0
   -5.8817   -1.2047    0.0000 C   0  0  0  0  0  0  0  0  0  0  0  0
   -5.8817   -2.0295    0.0000 N   0  0  0  0  0  0  0  0  0  0  0  0
   -5.1676   -2.4422    0.0000 B   0  5  0  0  0  0  0  0  0  0  0  0
   -4.4529   -2.0295    0.0000 N   0  3  0  0  0  0  0  0  0  0  0  0
   -4.4529   -1.2047    0.0000 C   0  0  0  0  0  0  0  0  0  0  0  0
   -3.6682   -2.2845    0.0000 C   0  0  0  0  0  0  0  0  0  0  0  0
   -3.1828   -1.6168    0.0000 C   0  0  0  0  0  0  0  0  0  0  0  0
   -3.6682   -0.9497    0.0000 C   0  0  0  0  0  0  0  0  0  0  0  0
   -6.6663   -0.9497    0.0000 C   0  0  0  0  0  0  0  0  0  0  0  0
   -7.1518   -1.6168    0.0000 C   0  0  0  0  0  0  0  0  0  0  0  0
   -6.6663   -2.2845    0.0000 C   0  0  0  0  0  0  0  0  0  0  0  0
   -3.4132   -0.1656    0.0000 C   0  0  0  0  0  0  0  0  0  0  0  0
   -3.4132   -3.0692    0.0000 C   0  0  0  0  0  0  0  0  0  0  0  0
   -5.5797   -3.1569    0.0000 F   0  0  0  0  0  0  0  0  0  0  0  0
   -4.7549   -3.1569    0.0000 F   0  0  0  0  0  0  0  0  0  0  0  0
   -5.1676    2.5081    0.0000 C   0  0  0  0  0  0  0  0  0  0  0  0
   -4.4529    2.9207    0.0000 O   0  0  0  0  0  0  0  0  0  0  0  0
   -5.8817    2.9207    0.0000 O   0  0  0  0  0  0  0  0  0  0  0  0
    2.6698    2.9207    0.0000 C   0  0  0  0  0  0  0  0  0  0  0  0
   -6.9214   -0.1656    0.0000 C   0  0  0  0  0  0  0  0  0  0  0  0
   -6.9214   -3.0692    0.0000 C   0  0  0  0  0  0  0  0  0  0  0  0
    3.3843    2.5082    0.0000 N   0  0  0  0  0  0  0  0  0  0  0  0
    4.1376    2.8439    0.0000 C   0  0  0  0  0  0  0  0  0  0  0  0
    4.6902    2.2312    0.0000 C   0  0  0  0  0  0  0  0  0  0  0  0
    4.2775    1.5165    0.0000 N   0  0  0  0  0  0  0  0  0  0  0  0
    3.4705    1.6879    0.0000 N   0  0  0  0  0  0  0  0  0  0  0  0
    5.5109    2.3172    0.0000 C   0  0  0  0  0  0  0  0  0  0  0  0
    5.8462    3.0709    0.0000 C   0  0  0  0  0  0  0  0  0  0  0  0
    6.6669    3.1569    0.0000 C   0  0  0  0  0  0  0  0  0  0  0  0
    7.1518    2.4897    0.0000 C   0  0  0  0  0  0  0  0  0  0  0  0
    6.8165    1.7360    0.0000 C   0  0  0  0  0  0  0  0  0  0  0  0
    5.9958    1.6495    0.0000 C   0  0  0  0  0  0  0  0  0  0  0  0
   -3.7406    2.5095    0.0000 C   0  0  0  0  0  0  0  0  0  0  0  0
   -3.0283    2.9207    0.0000 C   0  0  0  0  0  0  0  0  0  0  0  0
   -2.3161    2.5095    0.0000 C   0  0  0  0  0  0  0  0  0  0  0  0
   -1.6038    2.9207    0.0000 C   0  0  0  0  0  0  0  0  0  0  0  0
   -0.8915    2.5095    0.0000 C   0  0  0  0  0  0  0  0  0  0  0  0
   -0.1793    2.9207    0.0000 C   0  0  0  0  0  0  0  0  0  0  0  0
    0.5330    2.5095    0.0000 C   0  0  0  0  0  0  0  0  0  0  0  0
    1.2453    2.9207    0.0000 C   0  0  0  0  0  0  0  0  0  0  0  0
    1.9576    2.5095    0.0000 C   0  0  0  0  0  0  0  0  0  0  0  0
  1  2  2  0      
  2  3  1  0      
  3  4  2  0      
  4  5  1  0      
  5  6  2  0      
  6  1  1  0      
  3  7  1  0      
  7  8  1  0      
  8  9  1  0      
  9 10  1  0      
 10 11  1  0      
 11 12  1  0      
 12  7  2  0      
 11 13  2  0      
 13 14  1  0      
 14 15  2  0      
 15 12  1  0      
  8 16  2  0      
 16 17  1  0      
 17 18  2  0      
 18  9  1  0      
 15 19  1  0      
 13 20  1  0      
 10 21  1  0      
 10 22  1  0      
  6 23  1  0      
 23 24  1  0      
 23 25  2  0      
 24 40  1  0      
 48 26  1  0      
 16 27  1  0      
 18 28  1  0      
 26 29  1  0      
 29 30  1  0      
 30 31  2  0      
 31 32  1  0      
 32 33  2  0      
 33 29  1  0      
 31 34  1  0      
 34 35  2  0      
 35 36  1  0      
 36 37  2  0      
 37 38  1  0      
 38 39  2  0      
 39 34  1  0      
 40 41  1  0      
 41 42  1  0      
 42 43  1  0      
 43 44  1  0      
 44 45  1  0      
 45 46  1  0      
 46 47  1  0      
 47 48  1  0      
M  CHG  2  10  -1  11   1
M  END
